# Supplementary material for: Prevalence and Genomic Investigation of Multidrug-Resistant Salmonella Isolates from Companion Animals in Hangzhou, China
Source: MDPI journal article supplement (doi:10.3390/antibiotics11050625), 2022-05-05
Supplement: s1 [file s1]

**Supplementary Table S1. A summary of the companion-animal-origin *Salmonella* isolates.**

| <b>Strain name</b> | <b>Serotype</b> | <b>Sequencing type</b> | <b>BioProject number</b> | <b>BioSample number</b> |
|--------------------|-----------------|------------------------|--------------------------|-------------------------|
| 20180713-3-4       | Typhimurium     | ST19                   | PRJNA828007              | SAMN27655659            |
| 20180713-3-6       | Typhimurium     | ST19                   | PRJNA828007              | SAMN27655660            |
| 20180713-3-7       | Typhimurium     | ST19                   | PRJNA828007              | SAMN27655661            |
| 20180713-3-11      | Typhimurium     | ST19                   | PRJNA828007              | SAMN27655662            |
| 20181014-1-2       | Dublin          | ST10                   | PRJNA828007              | SAMN27655663            |
| 20181017-1-6       | Dublin          | ST10                   | PRJNA828007              | SAMN27655664            |
| 20181017-1-7       | Dublin          | ST10                   | PRJNA828007              | SAMN27655665            |
| 20181017-2-1       | Dublin          | ST10                   | PRJNA828007              | SAMN27655666            |
| 20181017-2-2       | Dublin          | ST10                   | PRJNA828007              | SAMN27655667            |
| 20181017-2-5       | Dublin          | ST10                   | PRJNA828007              | SAMN27655668            |
| 20181018-2-3       | Dublin          | ST10                   | PRJNA828007              | SAMN27655669            |
| 20181018-2-4       | Dublin          | ST10                   | PRJNA828007              | SAMN27655670            |
| 20181018-2-5       | Dublin          | ST10                   | PRJNA828007              | SAMN27655671            |
| 20181018-2-7       | Dublin          | ST10                   | PRJNA828007              | SAMN27655672            |
| 20181018-2-9       | Dublin          | ST10                   | PRJNA828007              | SAMN27655673            |
| 20181018-3-2       | Dublin          | ST10                   | PRJNA828007              | SAMN27655674            |
| 20181018-3-4       | Dublin          | ST10                   | PRJNA828007              | SAMN27655675            |
| 20181018-3-7       | Dublin          | ST10                   | PRJNA828007              | SAMN27655676            |
| 20181018-3-11      | Dublin          | ST10                   | PRJNA828007              | SAMN27655677            |
| 20181018-3-13      | Dublin          | ST10                   | PRJNA828007              | SAMN27655678            |
| 20181019-1-13      | Dublin          | ST10                   | PRJNA828007              | SAMN27655679            |
| 20181019-1-17      | Dublin          | ST10                   | PRJNA828007              | SAMN27655680            |
| 20181019-1-18      | Dublin          | ST10                   | PRJNA828007              | SAMN27655681            |
| 20181019-2-3       | Dublin          | ST10                   | PRJNA828007              | SAMN27655682            |
| 20181019-2-4       | Dublin          | ST10                   | PRJNA828007              | SAMN27655683            |
| 20181019-2-9       | Dublin          | ST10                   | PRJNA828007              | SAMN27655684            |

**Supplementary Table S2. Antimicrobial susceptibility testing of *Salmonella* isolates.**

| Class                 | Antibiotic agent            | Abbreviation | Antibiotic concentration range (µg/ml) | Breakpoint interpretive criteria (µg/mL) |       |        | %AR (aerobic) | %AR (anaerobic) |
|-----------------------|-----------------------------|--------------|----------------------------------------|------------------------------------------|-------|--------|---------------|-----------------|
|                       |                             |              |                                        | S*                                       | I     | R      |               |                 |
| Aminoglycosides       | Kanamycin                   | KAN          | 0.125~64                               | ≤16                                      | 32    | ≥64    | 88.50%        | 88.50%          |
|                       | Gentamicin                  | GEN          | 0.06~32                                | ≤4                                       | 8     | ≥16    | 3.80%         | 3.80%           |
|                       | Streptomycin                | STR          | 0.125~64                               | ≤16                                      | -     | ≥32    | 100.00%       | 100.00%         |
| Penicillin            | Ampicillin                  | AMP          | 0.25~128                               | ≤8                                       | 16    | ≥32    | 88.50%        | 88.50%          |
| β-lactams combination | Amoxicillin-Clavulanic acid | AMC          | 64/32~0.12/0.06                        | ≤8/4                                     | 16-32 | ≥32/16 | 84.60%        | 84.60%          |
|                       | Ceftiofur                   | CF           | 0.25~128                               | ≤1                                       | 2     | ≥4     | 88.50%        | 100.00%         |
| Cephems               | Ceftriaxone                 | CRO          | 0.25~128                               | ≤1                                       | 2     | ≥4     | 92.30%        | 92.30%          |
|                       | Cefoxitin                   | FOX          | 0.125~64                               | ≤8                                       | 16    | ≥32    | 84.60%        | 84.60%          |
| Phenicol              | Chloramphenicol             | CHL          | 0.125~64                               | ≤8                                       | 16    | ≥32    | 84.60%        | 73.10%          |
| Tetracyclines         | Tetracycline                | TET          | 0.125~64                               | ≤4                                       | 8     | ≥16    | 96.20%        | 96.20%          |
| Macrolides            | Azithromycin                | AZM          | 0.125~64                               | ≤16                                      | -     | ≥32    | 3.80%         | 3.80%           |
| Sulphonamides         | Cotrimoxazole               | SXT          | 0.06/1.14~32/608                       | ≤2/38                                    | -     | ≥4/76  | 100.00%       | 100.00%         |
| Quinolones            | Nalidixic acid              | NAL          | 0.125~64                               | ≤16                                      | -     | ≥32    | 7.70%         | 7.70%           |
|                       | Ciprofloxacin               | CIP          | 0.03~16                                | ≤1                                       | 2     | ≥4     | 19.20%        | 11.54%          |
| Polymyxins            | Colistin                    | CST          | 0.06~32                                | ≤2                                       | -     | ≥4     | 11.50%        | 11.50%          |

\* S, sensitive; I, intermediate resistance; and R, resistant.

**Supplementary Table S3. The antimicrobial-resistant pattern of *Salmonella* isolates in the aerobic condition.**

| No. of drugs | No. of antimicrobial classes | Antimicrobial-resistant spectrum*                      | No. of isolates |
|--------------|------------------------------|--------------------------------------------------------|-----------------|
| 3            | 3                            | STR-SXT-CIP                                            | 1               |
| 4            | 4                            | STR-TET-SXT-CIP                                        | 1               |
| 5            | 5                            | STR-CRO-TET-SXT-CIP                                    | 1               |
| 9            | 6                            | KAN-STR-AMP-CF-CRO-TET-SXT-NAL-CIP                     | 1               |
| 10           | 7                            | KAN-STR-AMP-AMC-CF-CRO-FOX-CHL-TET-SXT                 | 19              |
| 11           | 8                            | KAN-STR-AMP-AMC-CF-CRO-FOX-CHL-TET-SXT-CST             | 1               |
| 12           | 9                            | KAN-STR-AMP-AMC-CF-CRO-FOX-CHL-TET-SXT-CIP-CST         | 1               |
| 14           | 10                           | KAN-GEN-STR-AMP-AMC-CF-CRO-FOX-CHL-TET-AZM-SXT-NAL-CST | 1               |

\* KAN: Kanamycin, GEN: Gentamicin, STR: Streptomycin, AMP: Ampicillin, AMC: Amoxicillin/clavulanic acid, CF: Ceftiofur, CRO: Ceftriaxone, FOX: Cefoxitin, CHL: Chloramphenicol, TET: Tetracycline, AZM: Azithromycin, SXT: Cotrimoxazole, NAL: Nalidixic acid, CIP: Ciprofloxacin, CST: Colistin.

**Supplementary Table S4. The antimicrobial-resistant pattern of *Salmonella* isolates in the anaerobic condition.**

| <b>No. of drugs</b> | <b>No. of antimicrobial classes</b> | <b>Antimicrobial-resistant spectrum in anaerobic condition *</b> | <b>No. of isolates</b> |
|---------------------|-------------------------------------|------------------------------------------------------------------|------------------------|
| 2                   | 2                                   | STR-SXT                                                          | 1                      |
| 3                   | 3                                   | STR-TET-SXT                                                      | 1                      |
| 4                   | 4                                   | STR-CRO-TET-SXT                                                  | 1                      |
| 9                   | 6                                   | KAN-STR-AMP-AMC-CF-CRO-FOX-TET-SXT                               | 3                      |
| 9                   | 6                                   | KAN-STR-AMP-CF-CRO-TET-SXT-NAL-CIP                               | 1                      |
| 10                  | 7                                   | KAN-STR-AMP-AMC-CF-CRO-FOX-CHL-TET-SXT                           | 16                     |
| 11                  | 8                                   | KAN-STR-AMP-AMC-CF-CRO-FOX-CHL-TET-SXT-CST                       | 1                      |
| 12                  | 9                                   | KAN-STR-AMP-AMC-CF-CRO-FOX-CHL-TET-SXT-CIP-CST                   | 1                      |
| 14                  | 10                                  | KAN-GEN-STR-AMP-AMC-CF-CRO-FOX-CHL-TET-AZM-SXT-NAL-CST           | 1                      |

\* KAN: Kanamycin, GEN: Gentamicin, STR: Streptomycin, AMP: Ampicillin, AMC: Amoxicillin/clavulanic acid, CF: Ceftiofur, CRO: Ceftriaxone, FOX: Cefoxitin, CHL: Chloramphenicol, TET: Tetracycline, AZM: Azithromycin, SXT: Cotrimoxazole, NAL: Nalidixic acid, CIP: Ciprofloxacin, CST: Colistin .
